# Supplementary material
Source: PubMed Central journal article supplement (PMC3038766)
Supplement: 1003403108_pnas.201003403SI.pdf [file 1003403108_pnas.201003403SI.pdf]

# Supporting Information

Honda et al. 10.1073/pnas.1003403108

## SI Materials and Methods

**Northern Blot Analysis.** A murine tissue mRNA blot (Mouse MTN Blot) containing 2  $\mu$ g of mRNA from eight different tissues was purchased from Clontech Laboratories, Inc. Human hematopoietic cell line mRNA was extracted using TRIzol (Invitrogen), followed by Oligo-Tex (Takara Bio Inc.), and 4  $\mu$ g of mRNA from each line was transferred to a nylon membrane. Both filters were hybridized with mouse *hemp* cDNA or a  $\beta$ -actin cDNA probe.

**Construction of a Targeting Vector and Generation of *hemp* Knockout Mice.** A BAC clone containing the mouse *hematopoietic expressed mammalian polycomb (hemp)* gene was isolated from a mouse genomic BAC library (Genome Systems, Inc.) using a portion of the mouse *hemp* cDNA as a probe. A 12-kb genomic fragment from an ApaI site in intron 2 to an EcoRV site in exon 6, and a 4-kb genomic fragment from a ClaI site in exon 9 to an ApaI site in intron 11 were used as the 5' and 3' arms of the knockout vector, respectively. A fragment containing *IRE5/GFP* (derived from *pIRE52-EGFP*; Clontech Laboratories Inc.), an *SV40* polyadenylation signal, and a *floxed Neo* resistance gene were inserted between the 5' and 3' arms, and a *diphtheria toxin A (DTA)* gene was attached to the 5' end of the vector as a negative selector. ES cells ( $1 \times 10^5$ ) from E14 (kindly provided by Nobuaki Yoshida, Institute of Medical Science, University of Tokyo, Japan) were electroporated with 30- $\mu$ g linearized vector and selected with 400  $\mu$ g/mL of G418. Individual candidate clones were screened by genomic PCR using the following primers: 5' P1 (5'-CAGACTTCAGGTAACGGTACAGAAACCTTC-3') and P2 (5'-AAGACCCCTAGGAATGCTCGTCAAGAAGAC-3'), followed by Southern blottings using an external 3' probe. Correctly targeted cells were microinjected into blastocysts derived from C57BL/6 $\times$ BDF1 mice. Chimeric male mice were crossed with C57BL/6 female mice to for transmit transmission of the mutant allele to the progeny. The *Neo* resistance gene was removed by microinjecting a *Cre* expression vector into fertilized eggs obtained from crossing *hemp* heterozygotes with C57BL/6 mice. Mice that had been backcrossed to the C57BL/6-Ly5.2 background at least seven times were used for these studies. All mice were maintained according to the guidelines of the Institute of Laboratory Animal Science, Hiroshima University.

**Generation of an Anti-Hemp Antibody, Immunoprecipitation, and Western Blot Analysis.** A 5' segment of mouse *hemp* cDNA, corresponding to amino acids 5 to 91 of the protein product, was amplified using the following primers: 5'-GACGGATCCGATAGCTGCAGT-3' and 5'-CCAGAATTCTTGCCTTCTTA-3', where the underlined nucleotides were substituted to create restriction-enzyme sites. The PCR product was subcloned into the bacterial expression vector, *pGEX1* (Amersham Pharmacia). Recombinant protein was purified using an anti-GST column and used to immunize rabbits to generate a polyclonal antibody against the N-terminal region of mouse Hemp (HempN). To detect Hemp protein, aliquots of  $\sim$ 1 mg of protein were incubated with the HempN antibody (1:400) coupled to Protein A. Then, the immunoprecipitated protein was separated by 7.5% SDS/PAGE, transferred to a polyvinylidene membrane, and blotted with the same antibody (1:3,000). Signals were detected using the ECL chemiluminescent system (Amersham).

**Skeletal Analysis.** Skeletal analysis was performed essentially as previously described (1). In brief, mouse embryos were fixed in 95% ethanol, defatted in acetone, and subjected to staining with

Alizarin red S for bone and Alcian blue for cartilage. The stained specimens were cleared with 1% KOH and stored in glycerol.

**Quantitative Real-Time PCR.** Quantitative real-time PCR was performed as previously described (2). PCR primers for murine *hemp* were purchased from Takara Bio Inc.

**Immunohistochemical Analysis.** Preparation of sagittal sections of the embryos and immunohistochemical staining were performed as previously described using the HempN antibody (1:50) (3).

**Flow Cytometric Analysis.** Flow cytometric analysis was performed essentially as previously described (4). Monoclonal antibodies (mAbs) used in this study are: anti-CD4-PE, anti-CD4-allophycocyanin (RM4-5), anti-CD8-PE (53-6.7), anti-CD3-PE (145-2C11), anti-CD25-allophycocyanin (PC61), anti-c-Kit-allophycocyanin (2B8), anti-B220-PE (RA3-6B2), anti-Mac1-PE (M1/70), anti-Gr1-allophycocyanin (RB6-8C5), anti-Ter-119-PE, anti-CD45.1-PE (A20), anti-CD45.2-FITC (104), anti-CD32/CD16 (2.4G2) (to block Fc receptors).

**CFU-C, HPP-CFC, and Competitive Repopulation Assays.** Sorted CD150+ LSK cells from FL were cultured in MethoCult GF3434 (StemCell Technologies Inc.) and colonies were counted on day 8 (CFU-C) or day 16 (HPP-CFC). For the competitive repopulation assay, sorted CD150+ LSK cells from E14.5 FL (Ly5.2) were transplanted into irradiated (9.5 Gy) Ly5.1 recipients together with Ly5.1 bone marrow mononuclear cells. Peripheral blood and bone marrow chimerisms were analyzed as previously described (5).

**Cell Cycle and Apoptosis Assays.** The short-term BrdU incorporation assay with sorted cells was performed as previously described (2). To detect apoptotic cells, sorted cells were attached to glass slides, fixed, stained with anticlaved caspase-3 antibody (Cell Signaling Technology Inc.), and visualized using a fluorophore-conjugated secondary antibody and DAPI counterstain. Apoptotic cleaved caspase-3-positive cells were analyzed and counted using a confocal microscope.

**DNA Microarray Analysis, Microarray Scanning, and Data Processing.** Total RNA was isolated using TRIzol reagent (Invitrogen) from lineage (lin)<sup>-</sup>/c-kit<sup>high</sup> cells isolated from E12.5 *hemp*<sup>+/+</sup> and *hemp*<sup>-/-</sup> fetal livers using TRIzol reagent (Invitrogen). The amplification and preparation of amino allyl RNA (aRNA) and the labeling of aRNA with the fluorescence dyes, Cy3 and Cy5, were performed with the Amino Allyl MessageAmp II aRNA Amplification Kit (Ambion Inc.). The Cy3- or Cy5-labeled aRNAs were hybridized to the probes on the 3D-Genemouse oligo chip 24k (Toray Industries Inc.) according to the manufacturer's instructions.

Microarrays were scanned using a ScanArray Lite Scanner (Perkin-Elmer) and the photomultiplier tube levels were adjusted to achieve 0.1% to 0.5% pixel saturation. Each tagged-image file-format image was analyzed using GenePix Pro-6.0 (Molecular Devices). Data were filtered to remove low-confidence measurements, and the data were globally normalized globally per array such that the median log<sub>2</sub> (Cy3/Cy5 fluorescence ratio) was 0 after normalization. Results were further processed for Gene Ontology term enrichment using PathwayStudio6 software (Ariadne Genomics Inc.). Genes with global normalization scores greater than 50 in either *hemp*<sup>+/+</sup> or *hemp*<sup>-/-</sup> samples, and that differed by more than 1.5-fold between samples, were classified into "Biological process" and "Molecular function" categories. Those genes whose with expression levels that differed by more than twofold were characterized by MultiExperiment Viewer version 4.3.02 software (<http://www.tm4.org/mev.html>).



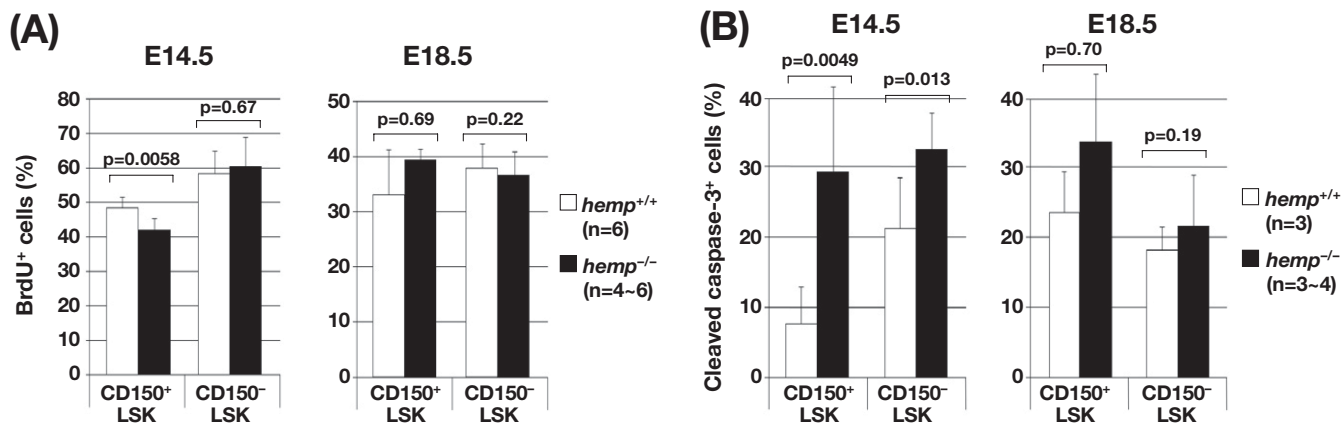

**Fig. 53.** Proliferative and apoptotic assays of *hemp*<sup>+/+</sup> and *hemp*<sup>-/-</sup> FL cells. (A) Quantification of short-term BrdU and incorporation in *hemp*<sup>+/+</sup> (open bar) and *hemp*<sup>-/-</sup> (closed bar) CD150<sup>+</sup> and CD150<sup>-</sup> LSK cells from E14.5 and E18.5 FLs. Cells were isolated after 90 min in vivo BrdU-labeling, stained with an anti-BrdU antibody, and analyzed by fluorescent microscopy. Frequencies of BrdU-positive cells were quantified (data ± SD). (B) Quantification of cleaved-caspase-3-positive cells in *hemp*<sup>+/+</sup> (open bar) and *hemp*<sup>-/-</sup> (closed bar) CD150<sup>+</sup> and CD150<sup>-</sup> LSK cells from E14.5 and E18.5 FLs. Cells were stained with an anti-cleaved-caspase-3 antibody, analyzed by fluorescent microscopy, and the frequencies of cleaved caspase-3-positive cells were quantified (data ± SD).

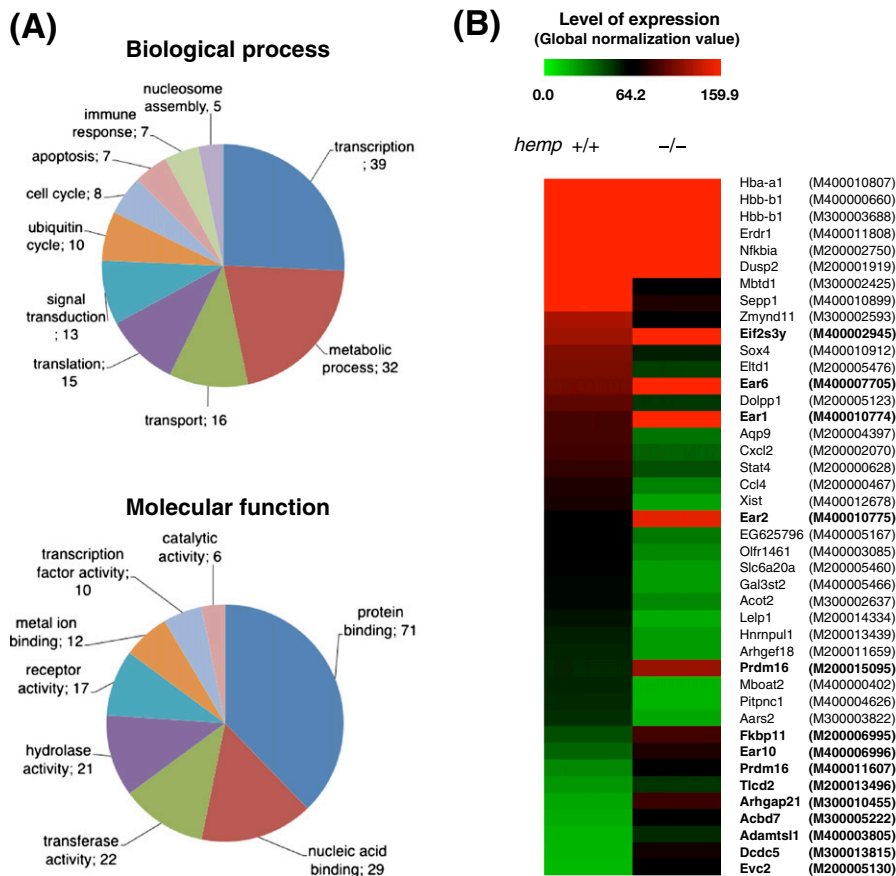

**Fig. 54.** Analysis of gene expression profiles in *lin*<sup>-/-</sup>*kit*<sup>high</sup> cells of E12.5 in *hemp*<sup>+/+</sup> and *hemp*<sup>-/-</sup> FLs. (A) The genes whose expression levels were more than 50 in *hemp*<sup>+/+</sup> or *hemp*<sup>-/-</sup> arrays and were altered more than 1.5-fold, and were classified into “Biological process” and “Molecular function” categories, according to the Gene Ontology terms. The classifications and gene numbers are shown. (B) Clustering of genes whose expression levels were more than 50 in *hemp*<sup>+/+</sup> or *hemp*<sup>-/-</sup> arrays and were altered more than 2.0-fold. Gene names are shown in the right with the probe IDs, and those with more than twofold increase in the expression in *hemp*<sup>-/-</sup> FL are shown in boldface.



**Table S2. Genes with expression levels showing greater than 1.5-fold up-regulation in *hemp*<sup>-/-</sup> arrays compared with *hemp*<sup>+/+</sup> arrays**

| Gene Symbol          | Description                                                                                                        | Global normalization ratio(Cy3/Cy5) | Global normalization Cy5_ Hemp WT | Global normalization Cy3_ Hemp KO | Probe ID   | Entrez Gene ID |
|----------------------|--------------------------------------------------------------------------------------------------------------------|-------------------------------------|-----------------------------------|-----------------------------------|------------|----------------|
| <i>Dcdc5</i>         | Doublecortin domain containing 5                                                                                   | 4.4                                 | 16.8                              | 74                                | M300013815 | 329482         |
| <i>Arhgap21</i>      | $\rho$ GTPase activating protein 21                                                                                | 4.1                                 | 21.4                              | 87.5                              | M300010455 | 71435          |
| <i>Evc2</i>          | Ellis van Creveld syndrome 2 homolog (human)                                                                       | 3.9                                 | 16.3                              | 63.7                              | M200005130 | 68525          |
| <i>Acbd7</i>         | Acyl-CoA binding domain containing 7                                                                               | 3.3                                 | 19.3                              | 64.4                              | M300005222 | 78245          |
| <i>Adamts1</i>       | ADAMTS-like 1                                                                                                      | 2.9                                 | 17.6                              | 51.6                              | M400003805 | 77739          |
| <i>Eif2s3y</i>       | Eukaryotic translation initiation factor 2, subunit 3, structural gene Y-linked                                    | 2.3                                 | 123.3                             | 280.4                             | M400002945 | 26908          |
| <i>Prdm16</i>        | PR domain containing 16                                                                                            | 2.3                                 | 29                                | 65.4                              | M400011607 | 70673          |
| <i>Prdm16</i>        | PR domain containing 16                                                                                            | 2.3                                 | 52.7                              | 120.6                             | M200015095 | 70673          |
| <i>Ear1</i>          | Eosinophil-associated, ribonuclease A family, member 1                                                             | 2.2                                 | 93.3                              | 201.9                             | M400010774 | 13586          |
| <i>Ear2</i>          | Eosinophil-associated, ribonuclease A family, member 2                                                             | 2.2                                 | 67.1                              | 150.6                             | M400010775 | 13587          |
| <i>Fkbp11</i>        | FK506 binding protein 11                                                                                           | 2.1                                 | 43.1                              | 90.9                              | M200006995 | 66120          |
| <i>Ear10</i>         | Eosinophil-associated, ribonuclease A family, member 10                                                            | 2.1                                 | 37.3                              | 77.4                              | M400006996 | 93725          |
| <i>Ear6</i>          | Eosinophil-associated, ribonuclease A family, member 6                                                             | 2                                   | 107.4                             | 217.8                             | M400007705 | 93719          |
| <i>Tlcd2</i>         | TLC domain containing 2                                                                                            | 2                                   | 24.8                              | 50.1                              | M200013496 | 380712         |
| <i>Top1mt</i>        | DNA topoisomerase 1, mitochondrial                                                                                 | 1.9                                 | 156.4                             | 294.9                             | M200012085 | 72960          |
| <i>Caskin2</i>       | Cask-interacting protein 2                                                                                         | 1.9                                 | 26.8                              | 50.8                              | M200013352 | 140721         |
| <i>4932438A13Rik</i> | RIKEN cDNA 4932438A13 gene                                                                                         | 1.9                                 | 39.7                              | 76.6                              | M300010838 | 229227         |
| <i>D10627</i>        | cDNA sequence D10627                                                                                               | 1.9                                 | 36.9                              | 70.6                              | M400007003 | 234358         |
| <i>Hist1h2bg</i>     | Histone cluster 1, H2bg                                                                                            | 1.9                                 | 518.7                             | 962.8                             | M300001635 | 319181         |
| <i>EG626903</i>      | Predicted gene, <i>EG626903</i>                                                                                    | 1.9                                 | 520.5                             | 1001.5                            | M400006972 | 626903         |
| <i>Cd59a</i>         | CD59a antigen                                                                                                      | 1.8                                 | 47.8                              | 84.4                              | M200002712 | 12509          |
| <i>Pcbd1</i>         | Pterin 4 $\alpha$ carbinolamine dehydratase/dimerization cofactor of hepatocyte nuclear factor 1 $\alpha$ (TCF1) 1 | 1.8                                 | 64.1                              | 113.7                             | M200008194 | 13180          |
| <i>Eif3e</i>         | Eukaryotic translation initiation factor 3, subunit E                                                              | 1.8                                 | 1973.8                            | 3457.1                            | M300003218 | 16341          |
| <i>Mgmt</i>          | O-6-methylguanine-DNA methyltransferase                                                                            | 1.8                                 | 145.9                             | 267.1                             | M400010845 | 17314          |
| <i>Olf47</i>         | Olfactory receptor 47                                                                                              | 1.8                                 | 36.1                              | 64.7                              | M400007344 | 18346          |
| <i>Map4k1</i>        | Mitogen-activated protein kinase kinase kinase 1                                                                   | 1.8                                 | 408.9                             | 737.9                             | M300010878 | 26411          |
| <i>Gcat</i>          | Glycine C-acetyltransferase (2-amino-3-ketobutyrate-CoA ligase)                                                    | 1.8                                 | 136.7                             | 241.6                             | M200003649 | 26912          |
| <i>Snhg8</i>         | Small nucleolar RNA host gene (nonprotein coding) 8                                                                | 1.8                                 | 545.7                             | 1006.8                            | M300017518 | 66487          |
| <i>1190017012Rik</i> | RIKEN cDNA 1190017012 gene                                                                                         | 1.8                                 | 375.9                             | 687.9                             | M400003958 | 68936          |
| <i>Zfp566</i>        | Zinc finger protein 566                                                                                            | 1.8                                 | 51.7                              | 90.6                              | M400012176 | 72556          |
| <i>Ng23</i>          | Ng23 protein                                                                                                       | 1.8                                 | 81.3                              | 150.4                             | M200013291 | 78376          |
| <i>Hsd3b7</i>        | Hydroxy- $\delta$ -5-steroid dehydrogenase, 3 $\beta$ - and steroid $\delta$ -isomerase 7                          | 1.8                                 | 65.5                              | 120.8                             | M200009913 | 101502         |
| <i>Rdh9</i>          | Retinol dehydrogenase 9                                                                                            | 1.8                                 | 38.8                              | 68.2                              | M400003618 | 103142         |
| <i>Gipr</i>          | Gastric inhibitory polypeptide receptor                                                                            | 1.8                                 | 42                                | 76.5                              | M400001263 | 381853         |
| <i>LOC546711</i>     | Similar to 40S ribosomal protein S25                                                                               | 1.8                                 | 869                               | 1532.3                            | M400010160 | 546711         |
| <i>Hesx1</i>         | Homeo box gene expressed in ES cells                                                                               | 1.7                                 | 251.9                             | 427.9                             | M200001963 | 15209          |
| <i>Khk</i>           | Ketohexokinase                                                                                                     | 1.7                                 | 889                               | 1512.6                            | M300006522 | 16548          |
| <i>Prg2</i>          | Proteoglycan 2, bone marrow                                                                                        | 1.7                                 | 385                               | 655.8                             | M200009412 | 19074          |
| <i>Tcte3</i>         | t-Complex-associated testis expressed 3                                                                            | 1.7                                 | 92.2                              | 152.3                             | M400001917 | 21647          |
| <i>B9d1</i>          | B9 protein domain 1                                                                                                | 1.7                                 | 31.9                              | 54.7                              | M200007973 | 27078          |
| <i>2810405K02Rik</i> | RIKEN cDNA 2810405K02 gene                                                                                         | 1.7                                 | 37.7                              | 62.4                              | M300006458 | 66469          |
| <i>Esf1</i>          | ESF1, nucleolar prerRNA processing protein, homolog ( <i>Saccharomyces cerevisiae</i> )                            | 1.7                                 | 268.9                             | 457.4                             | M300011875 | 66580          |
| <i>Cgrrf1</i>        | Cell growth regulator with ring finger domain 1                                                                    | 1.7                                 | 73.5                              | 122.8                             | M400005060 | 68755          |
| <i>1700029101Rik</i> | RIKEN cDNA 1700029101 gene                                                                                         | 1.7                                 | 498.2                             | 824.3                             | M400009318 | 70005          |
| <i>Bbs7</i>          | Bardet-Biedl syndrome 7                                                                                            | 1.7                                 | 32.6                              | 56.5                              | M300010870 | 71492          |
| <i>Mterfd3</i>       | MTERF domain containing 3                                                                                          | 1.7                                 | 65.7                              | 113.2                             | M300019805 | 74238          |
| <i>Scpep1</i>        | Serine carboxypeptidase 1                                                                                          | 1.7                                 | 71.3                              | 119.9                             | M300000050 | 74617          |



Table S2. Cont.

| Gene Symbol          | Description                                                                        | Global normalization ratio(Cy3/Cy5) | Global normalization Cy5_ Hemp WT | Global normalization Cy3_ Hemp KO | Probe ID   | Entrez Gene ID |
|----------------------|------------------------------------------------------------------------------------|-------------------------------------|-----------------------------------|-----------------------------------|------------|----------------|
| <i>Rfp14</i>         | Ret finger protein-like 4                                                          | 1.7                                 | 122.8                             | 204.6                             | M200006154 | 192658         |
| <i>Socs2</i>         | Suppressor of cytokine signaling 2                                                 | 1.7                                 | 41.7                              | 71                                | M200001605 | 216233         |
| <i>Zfp503</i>        | Zinc finger protein 503                                                            | 1.7                                 | 29.2                              | 50                                | M200004050 | 218820         |
| <i>Shprh</i>         | SNF2 histone linker PHD RING helicase                                              | 1.7                                 | 37.5                              | 61.9                              | M200004083 | 268281         |
| <i>EG435392</i>      | Predicted gene, <i>EG435392</i>                                                    | 1.7                                 | 71.8                              | 124.4                             | M400001592 | 435392         |
| <i>Scye1</i>         | Small inducible cytokine subfamily E, member 1                                     | 1.6                                 | 1311.1                            | 2098.3                            | M300005908 | 13722          |
| <i>Igtp</i>          | IFN- $\gamma$ induced GTPase                                                       | 1.6                                 | 38.7                              | 63.4                              | M400011289 | 16145          |
| <i>Phyh</i>          | Phytanoyl-CoA hydroxylase                                                          | 1.6                                 | 37                                | 60.8                              | M200005407 | 16922          |
| <i>Phb</i>           | Prohibitin                                                                         | 1.6                                 | 1573.6                            | 2532.7                            | M300011808 | 18673          |
| <i>Pik3ca</i>        | Phosphatidylinositol 3-kinase, catalytic, $\alpha$ polypeptide                     | 1.6                                 | 32                                | 52.6                              | M200013803 | 18706          |
| <i>Tfrc</i>          | Transferrin receptor                                                               | 1.6                                 | 971.2                             | 1556.3                            | M200006124 | 22042          |
| <i>Ctr9</i>          | Ctr9, Paf1/RNA polymerase II complex component, homolog ( <i>S. cerevisiae</i> )   | 1.6                                 | 45.6                              | 75.1                              | M200000180 | 22083          |
| <i>Chek2</i>         | CHK2 checkpoint homolog ( <i>Schizosaccharomyces pombe</i> )                       | 1.6                                 | 169.3                             | 277.2                             | M200013896 | 50883          |
| <i>Zfp644</i>        | Zinc finger protein 644                                                            | 1.6                                 | 68.3                              | 111.9                             | M200004912 | 52397          |
| <i>Nola2</i>         | Nucleolar protein family A, member 2                                               | 1.6                                 | 190.5                             | 298.8                             | M200005882 | 52530          |
| <i>Ireb2</i>         | Iron responsive element binding protein 2                                          | 1.6                                 | 70.6                              | 110.9                             | M300008167 | 64602          |
| <i>Lsm7</i>          | LSM7 homolog, U6 small nuclear RNA associated ( <i>S. cerevisiae</i> )             | 1.6                                 | 688.2                             | 1121                              | M400011474 | 66094          |
| <i>Ccdc72</i>        | Coiled-coil domain containing 72                                                   | 1.6                                 | 1629.5                            | 2565.8                            | M400006621 | 66167          |
| <i>1110036O03Rik</i> | RIKEN cDNA 1110036O03 gene                                                         | 1.6                                 | 32                                | 50.2                              | M300000865 | 66180          |
| <i>1810014B01Rik</i> | RIKEN cDNA 1810014B01 gene                                                         | 1.6                                 | 827.4                             | 1291.9                            | M400008225 | 66263          |
| <i>Chchd7</i>        | Coiled-coil-helix-coiled-coil-helix domain containing 7                            | 1.6                                 | 1155.3                            | 1882.4                            | M300013556 | 66433          |
| <i>Nuf2</i>          | NUF2, NDC80 kinetochore complex component, homolog ( <i>S. cerevisiae</i> )        | 1.6                                 | 442.9                             | 730.2                             | M300005239 | 66977          |
| <i>Nkap</i>          | NF $\kappa$ B activating protein                                                   | 1.6                                 | 35.6                              | 57.8                              | M200013737 | 67050          |
| <i>Rpl14</i>         | Ribosomal protein L14                                                              | 1.6                                 | 793.9                             | 1262.3                            | M200014008 | 67115          |
| <i>Hist1h2bc</i>     | Histone cluster 1, H2bc                                                            | 1.6                                 | 434.4                             | 679.2                             | M400011439 | 68024          |
| <i>Rpl22l1</i>       | Ribosomal protein L22 like 1                                                       | 1.6                                 | 3538.1                            | 5523.3                            | M300012040 | 68028          |
| <i>6720467C03Rik</i> | RIKEN cDNA 6720467C03 gene                                                         | 1.6                                 | 238.6                             | 376.1                             | M200005112 | 68099          |
| <i>Rpl39l</i>        | Ribosomal protein L39-like                                                         | 1.6                                 | 56.5                              | 92                                | M200004670 | 68172          |
| <i>Apoo</i>          | Apolipoprotein O                                                                   | 1.6                                 | 344                               | 563.3                             | M300019988 | 68316          |
| <i>Mitd1</i>         | MIT, microtubule interacting and transport, domain containing 1                    | 1.6                                 | 192.9                             | 308.2                             | M300004929 | 69028          |
| <i>Mllt3</i>         | Myeloid/lymphoid or mixed-lineage leukemia (trithorax homolog, <i>Drosophila</i> ) | 1.6                                 | 35.3                              | 56.2                              | M300006125 | 70122          |
| <i>5730469M10Rik</i> | RIKEN cDNA 5730469M10 gene                                                         | 1.6                                 | 200.7                             | 325                               | M200005469 | 70564          |
| <i>Acn9</i>          | ACN9 homolog ( <i>S. cerevisiae</i> )                                              | 1.6                                 | 134.6                             | 212.6                             | M300013732 | 71238          |
| <i>Hspb11</i>        | Heat-shock protein family B (small), member 11                                     | 1.6                                 | 84.5                              | 133.7                             | M200004218 | 72938          |
| <i>2410076I21Rik</i> | RIKEN cDNA 2410076I21 gene                                                         | 1.6                                 | 38.3                              | 61.6                              | M200015162 | 73673          |
| <i>Josd3</i>         | Josephin domain containing 3                                                       | 1.6                                 | 715.5                             | 1129.8                            | M300007986 | 75316          |
| <i>Fdps</i>          | Farnesyl diphosphate synthetase                                                    | 1.6                                 | 588.2                             | 931.7                             | M400011865 | 110196         |
| <i>Zfp295</i>        | Zinc finger protein 295                                                            | 1.6                                 | 48.5                              | 75.8                              | M400013580 | 114565         |
| <i>AI987944</i>      | Expressed sequence AI987944                                                        | 1.6                                 | 30.4                              | 50.1                              | M400005490 | 233168         |
| <i>Sept7</i>         | Septin 7                                                                           | 1.6                                 | 228                               | 360.6                             | M300000235 | 235072         |
| <i>EG236844</i>      | Predicted gene, <i>EG236844</i>                                                    | 1.6                                 | 3123.1                            | 4841.1                            | M400003082 | 236844         |
| <i>EG270499</i>      | Predicted gene, <i>EG270499</i>                                                    | 1.6                                 | 116.4                             | 190                               | M400008464 | 270499         |
| <i>Rpl17</i>         | Ribosomal protein L17                                                              | 1.6                                 | 481.1                             | 771.9                             | M300004829 | 319195         |
| <i>Hcfc1r1</i>       | Host cell factor C1 regulator 1 (XPO1-dependent)                                   | 1.6                                 | 184.5                             | 293.1                             | M300003807 | 353502         |
| <i>EG383613</i>      | Predicted gene, <i>EG383613</i>                                                    | 1.6                                 | 1106.7                            | 1791.1                            | M400006417 | 383613         |
| <i>EG383815</i>      | Predicted gene, <i>EG383815</i>                                                    | 1.6                                 | 57.9                              | 91.7                              | M400005919 | 383815         |
| <i>EG432950</i>      | Predicted gene, <i>EG432950</i>                                                    | 1.6                                 | 2330.7                            | 3623.8                            | M400006352 | 432950         |

Table S2. Cont.

| Gene Symbol          | Description                                                                  | Global normalization ratio(Cy3/Cy5) | Global normalization Cy5_ Hemp WT | Global normalization Cy3_ Hemp KO | Probe ID   | Entrez Gene ID |
|----------------------|------------------------------------------------------------------------------|-------------------------------------|-----------------------------------|-----------------------------------|------------|----------------|
| <i>EG623924</i>      | Predicted gene, <i>EG623924</i>                                              | 1.6                                 | 2439.2                            | 3863.3                            | M400006401 | 623924         |
| <i>Hmgb11</i>        | High mobility group box 1-like                                               | 1.6                                 | 192.8                             | 307.6                             | M400007851 | 625781         |
| <i>LOC676847</i>     | Similar to ribosomal protein S15a                                            | 1.6                                 | 1601                              | 2565.1                            | M400005666 | 676847         |
| <i>Cenpc1</i>        | Centromere protein C1                                                        | 1.5                                 | 84.8                              | 130.6                             | M400001150 | 12617          |
| <i>Cstb</i>          | Cystatin B                                                                   | 1.5                                 | 398.7                             | 598.8                             | M200002288 | 13014          |
| <i>Sdpr</i>          | Serum deprivation response                                                   | 1.5                                 | 39.2                              | 59.2                              | M300016875 | 20324          |
| <i>Trip6</i>         | Thyroid hormone receptor interactor 6                                        | 1.5                                 | 182.4                             | 277.5                             | M400000672 | 22051          |
| <i>Dkk11</i>         | Dickkopf-like 1                                                              | 1.5                                 | 41.4                              | 63.6                              | M200005492 | 50722          |
| <i>Nckap1</i>        | NCK-associated protein 1                                                     | 1.5                                 | 57.5                              | 87.3                              | M300005431 | 50884          |
| <i>Ccnc</i>          | Cyclin C                                                                     | 1.5                                 | 69.8                              | 104.9                             | M200001678 | 51813          |
| <i>C1d</i>           | Nuclear DNA binding protein                                                  | 1.5                                 | 90.4                              | 138.9                             | M200000938 | 57316          |
| <i>Dnajc15</i>       | DnaJ (Hsp40) homolog, subfamily C, member 15                                 | 1.5                                 | 567.2                             | 873.9                             | M200005658 | 66148          |
| <i>Esf1</i>          | ESF1, nucleolar prerRNA processing protein, homolog ( <i>S. cerevisiae</i> ) | 1.5                                 | 161.9                             | 249.2                             | M400015785 | 66580          |
| <i>Asb17</i>         | Ankyrin repeat and SOCS box-containing 17                                    | 1.5                                 | 104.3                             | 160.3                             | M200008852 | 66772          |
| <i>Ptgr1</i>         | Prostaglandin reductase 1                                                    | 1.5                                 | 690.9                             | 1051                              | M200007590 | 67103          |
| <i>Ccdc77</i>        | Coiled-coil domain containing 77                                             | 1.5                                 | 74.4                              | 111.9                             | M200014317 | 67200          |
| <i>Ndufb4</i>        | NADH dehydrogenase (ubiquinone) 1 $\beta$ subcomplex 4                       | 1.5                                 | 2138.7                            | 3214.6                            | M400008997 | 68194          |
| <i>Mrpl13</i>        | Mitochondrial ribosomal protein L13                                          | 1.5                                 | 957                               | 1459.8                            | M200002853 | 68537          |
| <i>2310001H12Rik</i> | RIKEN cDNA 2310001H12 gene                                                   | 1.5                                 | 467.5                             | 703.2                             | M400009683 | 69504          |
| <i>Bdh1</i>          | 3-hydroxybutyrate dehydrogenase, type 1                                      | 1.5                                 | 109.9                             | 169.3                             | M200006708 | 71911          |
| <i>Mettl10</i>       | Methyltransferase like 10                                                    | 1.5                                 | 453.8                             | 699.6                             | M200006100 | 72096          |
| <i>Kif2c</i>         | Kinesin family member 2C                                                     | 1.5                                 | 176.1                             | 270.4                             | M300006226 | 73804          |
| <i>2700078E11Rik</i> | RIKEN cDNA 2700078E11 gene                                                   | 1.5                                 | 52.3                              | 78.5                              | M200007079 | 78832          |
| <i>Pecr</i>          | Peroxisomal trans-2-enoyl-CoA reductase                                      | 1.5                                 | 246.6                             | 376.7                             | M300004977 | 111175         |
| <i>Ccdc52</i>        | Coiled-coil domain containing 52                                             | 1.5                                 | 43.7                              | 67.3                              | M300014152 | 212514         |
| <i>BC002059</i>      | cDNA sequence BC002059                                                       | 1.5                                 | 695.7                             | 1056.2                            | M400007106 | 213811         |
| <i>Pstk</i>          | Phosphoseryl-tRNA kinase                                                     | 1.5                                 | 116.1                             | 174.3                             | M300016933 | 214580         |
| <i>Rfesd</i>         | Rieske (Fe-S) domain containing                                              | 1.5                                 | 1087.8                            | 1643.2                            | M300014263 | 218341         |
| <i>Nup214</i>        | Nucleoporin 214                                                              | 1.5                                 | 163.7                             | 251.2                             | M300000236 | 227720         |
| <i>Tmem159</i>       | Transmembrane protein 159                                                    | 1.5                                 | 42.2                              | 64.7                              | M300007492 | 233806         |
| <i>Zfp512</i>        | Zinc finger protein 512                                                      | 1.5                                 | 43.7                              | 65.6                              | M200007002 | 269639         |
| <i>2610524H06Rik</i> | RIKEN cDNA 2610524H06 gene                                                   | 1.5                                 | 199.4                             | 304.7                             | M300018590 | 330173         |
| <i>Wdr51b</i>        | WD repeat domain 51B                                                         | 1.5                                 | 32.9                              | 51                                | M200014833 | 382406         |
| <i>EG383538</i>      | Predicted gene, <i>EG383538</i>                                              | 1.5                                 | 182.5                             | 277.1                             | M400006855 | 383538         |

**Table S3. Genes with expression levels showing greater than 1.5-fold down-regulation in *hemp*<sup>-/-</sup> arrays compared with *hemp*<sup>+/+</sup> arrays**

| Gene symbol          | Description                                                                               | Global normalization ratio(Cy3/Cy5) | Global normalization Cy5_ Hemp WT | Global normalization Cy3_ Hemp KO | Probe ID   | Entrez Gene ID |
|----------------------|-------------------------------------------------------------------------------------------|-------------------------------------|-----------------------------------|-----------------------------------|------------|----------------|
| <i>Mbtd1</i>         | Mbt domain containing 1                                                                   | 0.3                                 | 268.8                             | 67.7                              | M300002425 | 103537         |
| <i>Mboat2</i>        | Membrane bound O-acyltransferase domain containing 2                                      | 0.3                                 | 52.6                              | 18                                | M400000402 | 67216          |
| <i>Lelp1</i>         | Ate cornified envelope-like proline-rich 1                                                | 0.3                                 | 57.3                              | 19.2                              | M200014334 | 69332          |
| <i>Pitpnc1</i>       | Phosphatidylinositol transfer protein, cytoplasmic 1                                      | 0.3                                 | 52.3                              | 17.5                              | M400004626 | 71795          |
| <i>Xist</i>          | Inactive X specific transcripts                                                           | 0.3                                 | 76.8                              | 22                                | M400012678 | 213742         |
| <i>Dusp2</i>         | Dual specificity phosphatase 2                                                            | 0.4                                 | 485.5                             | 214.6                             | M200001919 | 13537          |
| <i>Hba-a1</i>        | Hemoglobin $\alpha$ , adult chain 1                                                       | 0.4                                 | 40556                             | 14779.3                           | M400010807 | 15122          |
| <i>Ccl4</i>          | Chemokine (C-C motif) ligand 4                                                            | 0.4                                 | 78.8                              | 30.7                              | M200000467 | 20303          |
| <i>Cxcl2</i>         | Chemokine (C-X-C motif) ligand 2                                                          | 0.4                                 | 88.5                              | 38.4                              | M200002070 | 20310          |
| <i>Aqp9</i>          | Aquaporin 9                                                                               | 0.4                                 | 92.7                              | 34.4                              | M200004397 | 64008          |
| <i>Arhgef18</i>      | Rho/rac guanine nucleotide exchange factor (GEF) 18                                       | 0.4                                 | 53.8                              | 23.9                              | M200011659 | 102098         |
| <i>Slc6a20a</i>      | Solute carrier family 6 (neurotransmitter transporter), member 20A                        | 0.4                                 | 61.3                              | 23.5                              | M200005460 | 102680         |
| <i>Eltf1</i>         | EGF, latrophilin seven transmembrane domain containing 1                                  | 0.4                                 | 110                               | 47.3                              | M200005476 | 170757         |
| <i>Erdr1</i>         | Erythroid differentiation regulator 1                                                     | 0.4                                 | 5458.1                            | 2350                              | M400011808 | 170942         |
| <i>Aars2</i>         | Alanyl-tRNA synthetase 2, mitochondrial (putative)                                        | 0.4                                 | 50.4                              | 20.6                              | M300003822 | 224805         |
| <i>Hnrnpul1</i>      | Heterogeneous nuclear ribonucleoprotein U-like 1                                          | 0.4                                 | 55.1                              | 23.3                              | M200013439 | 232989         |
| <i>Olf1r1461</i>     | Olfactory receptor 1461                                                                   | 0.4                                 | 64                                | 28.7                              | M400003085 | 258299         |
| <i>Gal3st2</i>       | Galactose-3-O-sulfotransferase 2                                                          | 0.4                                 | 59.2                              | 23.3                              | M400005466 | 381334         |
| <i>Cd69</i>          | CD69 antigen                                                                              | 0.5                                 | 122.3                             | 67.2                              | M200015388 | 12515          |
| <i>Hbb-b1</i>        | Hemoglobin, $\beta$ adult major chain                                                     | 0.5                                 | 17427                             | 7892.9                            | M400000660 | 15129          |
| <i>Hbb-b1</i>        | Hemoglobin, $\beta$ adult major chain                                                     | 0.5                                 | 13575.8                           | 7111                              | M300003688 | 15129          |
| <i>Nr4a1</i>         | Nuclear receptor subfamily 4, group A, member 1                                           | 0.5                                 | 196.1                             | 101                               | M200000038 | 15370          |
| <i>Junb</i>          | Jun-B oncogene                                                                            | 0.5                                 | 121                               | 63.1                              | M400004256 | 16477          |
| <i>Lmnb2</i>         | Lamin B2                                                                                  | 0.5                                 | 54.3                              | 27.4                              | M400007668 | 16907          |
| <i>Nfkbia</i>        | Nuclear factor of $\kappa$ light polypeptide gene enhancer in B-cells inhibitor, $\alpha$ | 0.5                                 | 642.4                             | 309.5                             | M200002750 | 18035          |
| <i>Ripk1</i>         | Receptor (TNFRSF)-interacting serine-threonine kinase 1                                   | 0.5                                 | 50.2                              | 25.9                              | M200001212 | 19766          |
| <i>Sepp1</i>         | Selenoprotein P, plasma, 1                                                                | 0.5                                 | 159.9                             | 79.7                              | M400010899 | 20363          |
| <i>Siah2</i>         | Seven in absentia 2                                                                       | 0.5                                 | 72.6                              | 36.9                              | M400001030 | 20439          |
| <i>Sox4</i>          | SRY-box containing gene 4                                                                 | 0.5                                 | 112.6                             | 53.9                              | M400010912 | 20677          |
| <i>Stat4</i>         | Signal transducer and activator of transcription 4                                        | 0.5                                 | 86                                | 42.6                              | M200000628 | 20849          |
| <i>Surf4</i>         | Surfeit gene 4                                                                            | 0.5                                 | 72.8                              | 38.3                              | M200001059 | 20932          |
| <i>Acot1</i>         | Acyl-CoA thioesterase 1                                                                   | 0.5                                 | 90.2                              | 49.4                              | M300013759 | 26897          |
| <i>Rgs1</i>          | Regulator of G protein signaling 1                                                        | 0.5                                 | 290.7                             | 152.9                             | M200008591 | 50778          |
| <i>Dolpp1</i>        | Dolichyl pyrophosphate phosphatase 1                                                      | 0.5                                 | 100.7                             | 48.6                              | M200005123 | 57170          |
| <i>Sertad2</i>       | SERTA domain containing 2                                                                 | 0.5                                 | 56.9                              | 31.1                              | M200008525 | 58172          |
| <i>Zmynd11</i>       | Zinc finger, MYND domain containing 11                                                    | 0.5                                 | 128.5                             | 62.8                              | M300002593 | 66505          |
| <i>Ppp1r14a</i>      | Protein phosphatase 1, regulatory (inhibitor) subunit 14A                                 | 0.5                                 | 53                                | 27.6                              | M400011578 | 68458          |
| <i>4931431F19Rik</i> | RIKEN cDNA 4931431F19 gene                                                                | 0.5                                 | 79                                | 40.7                              | M300022239 | 70980          |
| <i>Prr3</i>          | Proline-rich polypeptide 3                                                                | 0.5                                 | 51                                | 27.6                              | M300011587 | 75210          |



Table S3. Cont.

| Gene symbol               | Description                                                                                          | Global normalization ratio(Cy3/Cy5) | Global normalization Cy5_ Hemp WT | Global normalization Cy3_ Hemp KO | Probe ID   | Entrez Gene ID |
|---------------------------|------------------------------------------------------------------------------------------------------|-------------------------------------|-----------------------------------|-----------------------------------|------------|----------------|
| <i>Acot2</i>              | Acyl-CoA thioesterase 2                                                                              | 0.5                                 | 58.5                              | 28.7                              | M300002637 | 171210         |
| <i>Senp1</i>              | SUMO1/sentrin specific peptidase 1                                                                   | 0.5                                 | 50.9                              | 26.5                              | M200009018 | 223870         |
| <i>Muc20</i>              | Mucin 20                                                                                             | 0.5                                 | 50.1                              | 26.2                              | M300010024 | 224116         |
| <i>D330017J20Rik</i>      | RIKEN cDNA D330017J20 gene                                                                           | 0.5                                 | 67.7                              | 36.9                              | M400015990 | 320609         |
| <i>OTTMUSG00000016703</i> | Predicted gene, <i>OTTMUSG00000016703</i>                                                            | 0.5                                 | 50.9                              | 26.9                              | M400004839 | 329436         |
| <i>EG625796</i>           | Predicted gene, <i>EG625796</i>                                                                      | 0.5                                 | 65.4                              | 32.8                              | M400005167 | 625796         |
| <i>Angpt1</i>             | Angiopoietin 1                                                                                       | 0.6                                 | 82.7                              | 48.4                              | M300003197 | 11600          |
| <i>Arx</i>                | Aristaless related homeobox gene ( <i>Drosophila</i> )                                               | 0.6                                 | 52.2                              | 32.2                              | M200014722 | 11878          |
| <i>Btg2</i>               | B-cell translocation gene 2, antiproliferative                                                       | 0.6                                 | 62.3                              | 34.8                              | M200000321 | 12227          |
| <i>Cd48</i>               | CD48 antigen                                                                                         | 0.6                                 | 368.5                             | 236.9                             | M400000228 | 12506          |
| <i>CtsG</i>               | Cathepsin G                                                                                          | 0.6                                 | 117.4                             | 71.7                              | M200001999 | 13035          |
| <i>Phc1</i>               | Polyhomeotic-like 1 ( <i>Drosophila</i> )                                                            | 0.6                                 | 86.6                              | 50                                | M200002435 | 13619          |
| <i>Eef1a1</i>             | Eukaryotic translation elongation factor 1 $\alpha$ 1                                                | 0.6                                 | 57659                             | 34308.2                           | M400002052 | 13627          |
| <i>Egr1</i>               | Early growth response 1                                                                              | 0.6                                 | 152.1                             | 91.8                              | M200012044 | 13653          |
| <i>Eln</i>                | Elastin                                                                                              | 0.6                                 | 63.9                              | 41                                | M400001192 | 13717          |
| <i>Ext1</i>               | Exostosin (multiple) 1                                                                               | 0.6                                 | 76.7                              | 44.7                              | M300011671 | 14042          |
| <i>Fjx1</i>               | Four jointed box 1 ( <i>Drosophila</i> )                                                             | 0.6                                 | 61.7                              | 39.7                              | M400011012 | 14221          |
| <i>Srgap2</i>             | SLIT-ROBO Rho GTPase activating protein 2                                                            | 0.6                                 | 54.1                              | 31.8                              | M300005098 | 14270          |
| <i>Ggpi1</i>              | Geranylgeranyl diphosphate synthase 1                                                                | 0.6                                 | 93.5                              | 59.7                              | M300002685 | 14593          |
| <i>Gypa</i>               | Glycophorin A                                                                                        | 0.6                                 | 608.5                             | 364.9                             | M300007861 | 14934          |
| <i>Hbb-b2</i>             | Hemoglobin, $\beta$ adult minor chain                                                                | 0.6                                 | 2157.4                            | 1247.7                            | M400011276 | 15130          |
| <i>Hbb-y</i>              | Hemoglobin $\beta$ , $\beta$ -like embryonic chain                                                   | 0.6                                 | 96                                | 57.7                              | M300003689 | 15135          |
| <i>Hdac6</i>              | Histone deacetylase 6                                                                                | 0.6                                 | 62                                | 37.6                              | M200006690 | 15185          |
| <i>Ier3</i>               | Immediate early response 3                                                                           | 0.6                                 | 511.4                             | 307.9                             | M200005156 | 15937          |
| <i>Itpr3</i>              | Inositol 1, 4, 5-triphosphate receptor 3                                                             | 0.6                                 | 54.2                              | 30.9                              | M200005377 | 16440          |
| <i>PsmB8</i>              | Proteasome (prosome, macropain) subunit, $\beta$ type 8 (large multifunctional peptidase 7)          | 0.6                                 | 426.5                             | 238.6                             | M200003254 | 16913          |
| <i>Lyn</i>                | Yamaguchi sarcoma viral (v-yes-1) oncogene homolog                                                   | 0.6                                 | 56.8                              | 34.8                              | M400002593 | 17096          |
| <i>Lyz2</i>               | Lysozyme 2                                                                                           | 0.6                                 | 191.9                             | 118.5                             | M400005459 | 17105          |
| <i>Lyz1</i>               | Lysozyme 1                                                                                           | 0.6                                 | 148                               | 86.9                              | M400000367 | 17110          |
| <i>Marcks1</i>            | MARCKS-like 1                                                                                        | 0.6                                 | 467.8                             | 269.9                             | M300018771 | 17357          |
| <i>Myd116</i>             | Myeloid differentiation primary response gene 116                                                    | 0.6                                 | 76.8                              | 43.6                              | M200001567 | 17872          |
| <i>Pnlipr2</i>            | Pancreatic lipase-related protein 2                                                                  | 0.6                                 | 71.4                              | 45.2                              | M400000796 | 18947          |
| <i>Prodh</i>              | Proline dehydrogenase                                                                                | 0.6                                 | 67.9                              | 42.8                              | M400011110 | 19125          |
| <i>Raly</i>               | hnRNP-associated with lethal yellow                                                                  | 0.6                                 | 408.2                             | 252.8                             | M400011426 | 19383          |
| <i>Rbp1</i>               | Retinol binding protein 1, cellular                                                                  | 0.6                                 | 194.5                             | 125.9                             | M300017309 | 19659          |
| <i>Sub1</i>               | SUB1 homolog ( <i>S. cerevisiae</i> )                                                                | 0.6                                 | 56.1                              | 34.3                              | M300003141 | 20024          |
| <i>Sema4a</i>             | Sema domain, Ig domain (Ig), transmembrane domain (TM) and short cytoplasmic domain, (semaphorin) 4A | 0.6                                 | 81.9                              | 50.7                              | M200004279 | 20351          |
| <i>Serf1</i>              | Small EDRK-rich factor 1                                                                             | 0.6                                 | 216.7                             | 124.8                             | M200000687 | 20365          |
| <i>Spin1</i>              | Spindlin 1                                                                                           | 0.6                                 | 57.7                              | 35.4                              | M200013917 | 20729          |
| <i>Spnb1</i>              | Spectrin $\beta$ 1                                                                                   | 0.6                                 | 94.3                              | 58.7                              | M300002533 | 20741          |
| <i>Stat3</i>              | Signal transducer and activator of transcription 3                                                   | 0.6                                 | 100                               | 62.5                              | M200012506 | 20848          |
| <i>Cmpk2</i>              | Cytidine monophosphate (UMP-CMP) kinase 2, mitochondrial                                             | 0.6                                 | 60.2                              | 37                                | M300002295 | 22169          |
| <i>Zyx</i>                | Zyxin                                                                                                | 0.6                                 | 193                               | 108.8                             | M200002019 | 22793          |

Table S3. Cont.

| Gene symbol          | Description                                                                             | Global normalization ratio(Cy3/Cy5) | Global normalization Cy5_ Hemp WT | Global normalization Cy3_ Hemp KO | Probe ID   | Entrez Gene ID |
|----------------------|-----------------------------------------------------------------------------------------|-------------------------------------|-----------------------------------|-----------------------------------|------------|----------------|
| <i>Klf6</i>          | Kruppel-like factor 6                                                                   | 0.6                                 | 176.2                             | 105.7                             | M200012730 | 23849          |
| <i>Iqgap1</i>        | IQ motif containing GTPase activating protein 1                                         | 0.6                                 | 113.8                             | 72.4                              | M200014838 | 29875          |
| <i>Fbxl6</i>         | F-box and leucine-rich repeat protein 6                                                 | 0.6                                 | 232.3                             | 136.3                             | M200005638 | 30840          |
| <i>Park2</i>         | Parkin                                                                                  | 0.6                                 | 73.9                              | 43.4                              | M200013858 | 50873          |
| <i>Mcrs1</i>         | Microspherule protein 1                                                                 | 0.6                                 | 210.8                             | 134.7                             | M400003319 | 51812          |
| <i>Zfp622</i>        | Zinc finger protein 622                                                                 | 0.6                                 | 94.5                              | 57.1                              | M400004051 | 52521          |
| <i>D12Ert647e</i>    | DNA segment, Chr 12, ERATO Doi 647, expressed                                           | 0.6                                 | 55.9                              | 36.1                              | M400008599 | 52668          |
| <i>Arhgef5</i>       | $\rho$ Guanine nucleotide exchange factor (GEF) 5                                       | 0.6                                 | 66.8                              | 42.4                              | M400002303 | 54324          |
| <i>Tmem115</i>       | Transmembrane protein 115                                                               | 0.6                                 | 151                               | 97.1                              | M200005500 | 56395          |
| <i>Nudt3</i>         | Nudix (nucleotide diphosphate linked moiety X)-type motif 3                             | 0.6                                 | 95.2                              | 61.3                              | M200016350 | 56409          |
| <i>Dnajb12</i>       | DnaJ (Hsp40) homolog, subfamily B, member 12                                            | 0.6                                 | 51.7                              | 33.6                              | M200008554 | 56709          |
| <i>Pdpx</i>          | Pyridoxal (pyridoxine, vitamin B6) phosphatase                                          | 0.6                                 | 112.6                             | 64.3                              | M400011359 | 57028          |
| <i>Terf2ip</i>       | Telomeric repeat binding factor 2, interacting protein                                  | 0.6                                 | 115.4                             | 73.2                              | M200013251 | 57321          |
| <i>Lrp10</i>         | Low-density lipoprotein receptor-related protein 10                                     | 0.6                                 | 50.2                              | 32.2                              | M200006018 | 65107          |
| <i>Twsg1</i>         | Twisted gastrulation homolog 1 ( <i>Drosophila</i> )                                    | 0.6                                 | 79.8                              | 51.3                              | M200002883 | 65960          |
| <i>Ogfod2</i>        | 2-oxoglutarate and iron-dependent oxygenase domain containing 2                         | 0.6                                 | 54.6                              | 34.8                              | M400011506 | 66627          |
| <i>5730470L24Rik</i> | RIKEN cDNA 5730470L24 gene                                                              | 0.6                                 | 59.1                              | 36.5                              | M200008245 | 66641          |
| <i>Agtppb1</i>       | ATP/GTP binding protein 1                                                               | 0.6                                 | 68.3                              | 42.2                              | M200014357 | 67269          |
| <i>Cep70</i>         | Centrosomal protein 70                                                                  | 0.6                                 | 50.5                              | 29.8                              | M200003700 | 68121          |
| <i>1110018G07Rik</i> | RIKEN cDNA 1110018G07 gene                                                              | 0.6                                 | 58.9                              | 35.5                              | M200004898 | 68497          |
| <i>Ctdspl</i>        | CTD (carboxyl-terminal domain, RNA polymerase II, polypeptide A) small phosphatase-like | 0.6                                 | 73.5                              | 47.5                              | M200006149 | 69274          |
| <i>Rnf113a1</i>      | Ring finger protein 113A1                                                               | 0.6                                 | 78.2                              | 46.2                              | M300010421 | 69942          |
| <i>Tspan15</i>       | Tetraspanin 15                                                                          | 0.6                                 | 51.5                              | 31.7                              | M400012571 | 70423          |
| <i>Slc25a33</i>      | Solute carrier family 25, member 33                                                     | 0.6                                 | 145                               | 86.1                              | M300006413 | 70556          |
| <i>Acy3</i>          | Aspartoacylase (aminoacylase) 3                                                         | 0.6                                 | 65.7                              | 38.6                              | M200006624 | 71670          |
| <i>Ppp2r2a</i>       | Protein phosphatase 2 (formerly 2A), regulatory subunit B (PR 52), $\alpha$ isoform     | 0.6                                 | 173.2                             | 106.2                             | M400000535 | 71978          |
| <i>Ssbp3</i>         | Single-stranded DNA binding protein 3                                                   | 0.6                                 | 73.8                              | 47.2                              | M300006197 | 72475          |
| <i>MacroD2</i>       | MACRO domain containing 2                                                               | 0.6                                 | 77.6                              | 47.9                              | M400001005 | 72899          |
| <i>Psd</i>           | Pleckstrin and Sec7 domain containing                                                   | 0.6                                 | 55.5                              | 31.2                              | M300013961 | 73728          |
| <i>1200011M11Rik</i> | RIKEN cDNA 1200011M11 gene                                                              | 0.6                                 | 69.9                              | 44.4                              | M200004598 | 74133          |
| <i>2310066E14Rik</i> | RIKEN cDNA 2310066E14 gene                                                              | 0.6                                 | 76.9                              | 46.6                              | M200013530 | 75687          |
| <i>4930569F06Rik</i> | RIKEN cDNA 4930569F06 gene                                                              | 0.6                                 | 50.1                              | 32.3                              | M200011419 | 78055          |
| <i>5730596K20Rik</i> | RIKEN cDNA 5730596K20 gene                                                              | 0.6                                 | 57.9                              | 35.6                              | M200007535 | 109168         |
| <i>Phka2</i>         | Phosphorylase kinase $\alpha$ 2                                                         | 0.6                                 | 112                               | 68.3                              | M300007653 | 110094         |
| <i>Ms4a3</i>         | Membrane-spanning 4-domains, subfamily A, member 3                                      | 0.6                                 | 70                                | 45.3                              | M200008917 | 170813         |
| <i>Fchsd2</i>        | FCH and double SH3 domains 2                                                            | 0.6                                 | 70.3                              | 41.9                              | M300007360 | 207278         |
| <i>Mgst2</i>         | Microsomal GST 2                                                                        | 0.6                                 | 69.8                              | 40.2                              | M300019764 | 211666         |
| <i>Frat2</i>         | Frequently rearranged in advanced T-cell lymphomas 2                                    | 0.6                                 | 88.1                              | 55.6                              | M400003320 | 212398         |

Table S3. Cont.

| Gene symbol      | Description                                                                             | Global normalization ratio(Cy3/Cy5) | Global normalization Cy5_ Hemp WT | Global normalization Cy3_ Hemp KO | Probe ID   | Entrez Gene ID |
|------------------|-----------------------------------------------------------------------------------------|-------------------------------------|-----------------------------------|-----------------------------------|------------|----------------|
| <i>Tnrc6b</i>    | Trinucleotide repeat containing 6b                                                      | 0.6                                 | 56.4                              | 35.3                              | M200004519 | 213988         |
| <i>Sidt2</i>     | SID1 transmembrane family, member 2                                                     | 0.6                                 | 77.3                              | 48.2                              | M200005570 | 214597         |
| <i>Wipf1</i>     | WAS/WASL interacting protein family, member 1                                           | 0.6                                 | 55.3                              | 30.5                              | M300013345 | 215280         |
| <i>BC005764</i>  | cDNA sequence BC005764                                                                  | 0.6                                 | 68.7                              | 42.3                              | M300010107 | 216152         |
| <i>Ckap4</i>     | Cytoskeleton-associated protein 4                                                       | 0.6                                 | 240.3                             | 133.6                             | M300017714 | 216197         |
| <i>Mlh3</i>      | mutL homolog 3 ( <i>Escherichia coli</i> )                                              | 0.6                                 | 214                               | 135.8                             | M200008501 | 217716         |
| <i>Ankrd54</i>   | Ankyrin repeat domain 54                                                                | 0.6                                 | 62.7                              | 39.6                              | M200004849 | 223690         |
| <i>Pim3</i>      | Proviral integration site 3                                                             | 0.6                                 | 80.7                              | 46.2                              | M200006785 | 223775         |
| <i>Zdhhc14</i>   | Zinc finger, DHHC domain containing 14                                                  | 0.6                                 | 83.5                              | 46                                | M200004358 | 224454         |
| <i>Ppig</i>      | Peptidyl-prolyl isomerase G (cyclophilin G)                                             | 0.6                                 | 110                               | 64.8                              | M400002584 | 228005         |
| <i>Prkcbp1</i>   | Protein kinase C binding protein 1                                                      | 0.6                                 | 51.1                              | 32.7                              | M200011615 | 228880         |
| <i>Tmem41b</i>   | Transmembrane protein 41B                                                               | 0.6                                 | 94.4                              | 58.4                              | M200013985 | 233724         |
| <i>Zbtb44</i>    | Zinc finger and BTB domain containing 44                                                | 0.6                                 | 90.5                              | 58.1                              | M400001969 | 235132         |
| <i>Usp3</i>      | Ubiquitin specific peptidase 3                                                          | 0.6                                 | 80.5                              | 47.9                              | M200008148 | 235441         |
| <i>Tsp50</i>     | Testes-specific protease 50                                                             | 0.6                                 | 201.2                             | 126.8                             | M300019526 | 235631         |
| <i>Chsy1</i>     | Chondroitin sulfate synthase 1                                                          | 0.6                                 | 51                                | 33                                | M300008360 | 269941         |
| <i>Taf1</i>      | TAF1 RNA polymerase II, TATA box binding protein (TBP)-associated factor                | 0.6                                 | 56.5                              | 36.7                              | M300007669 | 270627         |
| <i>D11Wsu47e</i> | DNA segment, Chr 11, Wayne State University 47, expressed                               | 0.6                                 | 59.5                              | 35.1                              | M200007483 | 276852         |
| <i>Hist1h2ao</i> | Histone cluster 1, H2ao                                                                 | 0.6                                 | 52676                             | 33715.3                           | M400007165 | 319171         |
| <i>Hist1h2ab</i> | Histone cluster 1, H2ab                                                                 | 0.6                                 | 42329                             | 25035.8                           | M400012322 | 319172         |
| <i>Hist2h2ac</i> | Histone cluster 2, H2ac                                                                 | 0.6                                 | 41327                             | 23798.6                           | M400012323 | 319176         |
| <i>Jph4</i>      | Junctophilin 4                                                                          | 0.6                                 | 57.4                              | 37.3                              | M300003142 | 319984         |
| <i>Heatr2</i>    | HEAT repeat containing 2                                                                | 0.6                                 | 73.7                              | 46.8                              | M300004809 | 433956         |
| <i>EG627648</i>  | Predicted gene, EG627648                                                                | 0.6                                 | 532.8                             | 318.5                             | M300000928 | 627648         |
| <i>Ccng2</i>     | Cyclin G2                                                                               | 0.7                                 | 57.7                              | 37.5                              | M300006655 | 12452          |
| <i>Spsb2</i>     | SplA/ryanodine receptor domain and SOCS box containing 2                                | 0.7                                 | 79.9                              | 53.2                              | M200000999 | 14794          |
| <i>H2-T3</i>     | Histocompatibility 2, T region locus 3                                                  | 0.7                                 | 69.7                              | 45.6                              | M400004713 | 15043          |
| <i>Htt</i>       | Huntingtin                                                                              | 0.7                                 | 59.2                              | 39.4                              | M300006492 | 15194          |
| <i>Ifi203</i>    | IFN-activated gene 203                                                                  | 0.7                                 | 62.6                              | 41.5                              | M300005163 | 15950          |
| <i>Kcnk5</i>     | Potassium channel, subfamily K, member 5                                                | 0.7                                 | 69.6                              | 45.7                              | M200015255 | 16529          |
| <i>Cog1</i>      | component of oligomeric golgi complex 1                                                 | 0.7                                 | 79.2                              | 52.4                              | M200012092 | 16834          |
| <i>Ltb</i>       | Lymphotoxin B                                                                           | 0.7                                 | 63.2                              | 42.1                              | M200000678 | 16994          |
| <i>Cd93</i>      | CD93 antigen                                                                            | 0.7                                 | 93.3                              | 61                                | M200000240 | 17064          |
| <i>Rai1</i>      | Retinoic acid induced 1                                                                 | 0.7                                 | 52.4                              | 34.7                              | M200001924 | 19377          |
| <i>Ren2</i>      | Renin 2 tandem duplication of Ren1                                                      | 0.7                                 | 63.1                              | 42                                | M400011721 | 19702          |
| <i>Sla</i>       | Src-like adaptor                                                                        | 0.7                                 | 82                                | 53.9                              | M200002576 | 20491          |
| <i>Spint2</i>    | Serine protease inhibitor, Kunitz type 2                                                | 0.7                                 | 235.6                             | 157                               | M300007301 | 20733          |
| <i>Cd27</i>      | CD27 antigen                                                                            | 0.7                                 | 59.1                              | 38.5                              | M400001252 | 21940          |
| <i>Arih1</i>     | Ariadne ubiquitin-conjugating enzyme E2 binding protein homolog 1 ( <i>Drosophila</i> ) | 0.7                                 | 73.2                              | 48.2                              | M200012926 | 23806          |

Table S3. Cont.

| Gene symbol               | Description                                                              | Global normalization ratio(Cy3/Cy5) | Global normalization Cy5_ Hemp WT | Global normalization Cy3_ Hemp KO | Probe ID   | Entrez Gene ID |
|---------------------------|--------------------------------------------------------------------------|-------------------------------------|-----------------------------------|-----------------------------------|------------|----------------|
| <i>Sgta</i>               | Small glutamine-rich tetratricopeptide repeat (TPR)-containing, $\alpha$ | 0.7                                 | 97.8                              | 64.1                              | M200006817 | 52551          |
| <i>Ptges3</i>             | Prostaglandin E synthase 3 (cytosolic)                                   | 0.7                                 | 353.7                             | 235.7                             | M300012510 | 56351          |
| <i>Ttyh1</i>              | Tweety homolog 1 ( <i>Drosophila</i> )                                   | 0.7                                 | 54.2                              | 35.3                              | M400010682 | 57776          |
| <i>Tmem176a</i>           | Transmembrane protein 176A                                               | 0.7                                 | 76.1                              | 50                                | M200005402 | 66058          |
| <i>Gmpr</i>               | Guanosine monophosphate reductase                                        | 0.7                                 | 708.2                             | 467.2                             | M300000048 | 66355          |
| <i>Crip2</i>              | Cysteine rich protein 2                                                  | 0.7                                 | 72.9                              | 48.3                              | M400000130 | 68337          |
| <i>Lysmd2</i>             | LysM, putative peptidoglycan-binding, domain containing 2                | 0.7                                 | 60.3                              | 39.5                              | M400001435 | 70082          |
| <i>Zdhhc2</i>             | Zinc finger, DHHC domain containing 2                                    | 0.7                                 | 50.4                              | 33                                | M300012190 | 70546          |
| <i>Synpr</i>              | Synaptopodin                                                             | 0.7                                 | 66.7                              | 43.9                              | M400005462 | 72003          |
| <i>Jam3</i>               | Junction adhesion molecule 3                                             | 0.7                                 | 54.7                              | 36.1                              | M400001423 | 83964          |
| <i>Oosp1</i>              | Oocyte secreted protein 1                                                | 0.7                                 | 64.3                              | 42.3                              | M200004987 | 170834         |
| <i>V1rc17</i>             | Vomer nasal 1 receptor, C17                                              | 0.7                                 | 67                                | 44.2                              | M300019477 | 171190         |
| <i>Nrbp1</i>              | Nuclear receptor binding protein 1                                       | 0.7                                 | 84                                | 55.7                              | M200004273 | 192292         |
| <i>Trib2</i>              | Tribbles homolog 2 ( <i>Drosophila</i> )                                 | 0.7                                 | 93.9                              | 62.3                              | M300002269 | 217410         |
| <i>Slc39a10</i>           | Solute carrier family 39 (zinc transporter), member 10                   | 0.7                                 | 72.8                              | 48.2                              | M300004873 | 227059         |
| <i>Rtn4rl2</i>            | Reticulon 4 receptor-like 2                                              | 0.7                                 | 173                               | 114.6                             | M300021558 | 269295         |
| <i>Tpm4</i>               | Tropomyosin 4                                                            | 0.7                                 | 130                               | 85.3                              | M300007904 | 326618         |
| <i>Tubgcp6</i>            | Tubulin, $\gamma$ complex associated protein 6                           | 0.7                                 | 62.3                              | 41.5                              | M300010075 | 328580         |
| <i>Pram1</i>              | PML-RAR $\alpha$ -regulated adaptor molecule 1                           | 0.7                                 | 56.5                              | 37.5                              | M300008414 | 378460         |
| <i>EG544809</i>           | Predicted gene, <i>EG544809</i>                                          | 0.7                                 | 82.1                              | 54.7                              | M300016054 | 544809         |
| <i>ENSMUSG00000053270</i> | Predicted gene, <i>ENSMUSG00000053270</i>                                | 0.7                                 | 160.9                             | 105.6                             | M400004407 | 791285         |
